# Supplementary material for: Forced Activation of Notch in Macrophages Represses Tumor Growth by Upregulating miR-125a and Disabling Tumor-Associated Macrophages
Source: Oxford University Press journal article supplement (doi:10.1158/0008-5472.can-15-2019), 2016-01-13
Supplement: 00085472can152019-sup-153177_2_supp_3277704_nzl61k.docx [file 00085472can152019-sup-153177_2_supp_3277704_nzl61k.docx]

**SUPPLEMENTAL** **TABLES S1-S2**

**Table S1.** Primers and oligonucleotides used for PCR.

| **Name** | **Purpose** | **Sequence** |
| --- | --- | --- |
| Cre-F*  Cre-R*  RBP-J-F  RBP-J-WT-R  RBP-J-floxed-R  NIC-F  NIC-WT-R  NIC-floxed-R  RBP-J-F  RBP-J-R  Hey1-F  Hey1-R  Hes1-F  Hes1-R  Dll1-F  Dll1-R  Dll3-F  Dll3-R  Dll4-F  Dll4-R  Jag1-F  Jag1-R  Jag2-F  Jag2-R  Notch1-F  Notch1-R  Notch2-F  Notch2-R  Notch3-F  Notch3-R  Notch4-F  Notch4-R  Pri-mir-125a-F  Pri-mir-125a-R  FIH1-F  FIH1-R  IRF4-F  IRF4-R  iNOS-F  iNOS-R  TNF-α-F  TNF-α-R  IL-12-F  IL-12-R  IL-10-F  IL-10-R  MR-F  MR-R  TGF-β-F  TGF-β-R  Actin-F  Actin-R  FIH1 siRNA  IRF4 siRNA  YY1 siRNA  Notch1 siRNA1  Notch1 siRNA2  Notch1 siRNA3  Spaca6A-F  Spaca6A-R  MR-F1  MR-R1  MR-F2  MR-R2  MR-F3  MR-R3  MR-F4  MR-R4  Spaca6-Primer1**  Spaca6-Primer2 | Genotyping  Genotyping  Genotyping  Genotyping  Genotyping  Genotyping  Genotyping  Genotyping  RT-PCR  RT-PCR  RT-PCR  RT-PCR  RT-PCR  RT-PCR  RT-PCR  RT-PCR  RT-PCR  RT-PCR  RT-PCR  RT-PCR  RT-PCR  RT-PCR  RT-PCR  RT-PCR  RT-PCR  RT-PCR  RT-PCR  RT-PCR  RT-PCR  RT-PCR  RT-PCR  RT-PCR  RT-PCR  RT-PCR  RT-PCR  RT-PCR  RT-PCR  RT-PCR  RT-PCR  RT-PCR  RT-PCR  RT-PCR  RT-PCR  RT-PCR  RT-PCR  RT-PCR  RT-PCR  RT-PCR  RT-PCR  RT-PCR  RT-PCR  RT-PCR  siRNA  siRNA  siRNA  siRNA  siRNA  siRNA  ChIP  ChIP  ChIP  ChIP  ChIP  ChIP  ChIP  ChIP  ChIP  ChIP  RACE  RACE | 5'-CCGGTCGATGCAACGAGTGATGAGG  5'-GCCTCCAGCTTGCATGATCTCCGG  5'-GTTCTTAACCTGTTGGTCGGAACC  5'-GCTTGAGGCTTGATGTTCTGTATTGC  5'-ACCGGTGGATGTGGAATGTGT  5'-AAAGTCGCTCTGAGTTGTTAT  5'-TAAGCCTGCCCAGAAGACTC  5'-GAAAGACCGCGAAGAGTTTG  5'-TTCAATCGCCTTCGGTCC  5'-TGCCCGTAATGGATGTAG  5'-CATGAAGAGAGCTCACCCAGA  5'-CGCCGAACTCAAGTTTCC  5'-GCAGACATTCTGGAAATGACTGTGA  5'-GAGTGCGCACCTCGGTGTTA  5'-CTGCGAGGACAATGTGGATG  5'-CAGTTCTTGCCCGTGTAGCC  5'-CCTGAGGTTACAAGACGGTGCT  5'-GGGCTGGTATGACATAAATGGA  5'-GCTAGTGGTACTGCTGGTGCT  5'-CAGATTGTTCATGGCTTCCCT  5'-CAGCTTCGGCTCAGGGTCTA  5'-GGCAGTACGATGCGATTACG  5'-AGGAGTACCAGGCCAAGGTGA  5'-GGCGGCAGGTAGAAGGAGTT  5'-CCGTGTAAGAATGCTGGAACG  5'-AGCGACAGATGTATGAAGACTCA  5'-CAGCCTGTATGTGCCCTGTG  5'-GTGCTCCCTTCAAAACCTGCA  5'-TGCCAGAGTTCAGTGGTGG  5'-CACAGGCAAATCGGCCATA  5'-CTCTTGCCACTCAATTTCCCT  5'-TTGCAGAGTTGGGTATCCCTG  5'-CTGACGCTTGGCAACCTATTCC  5'-GCTGTTGAGGTGGTGACAAAGG  5'-CCCAGCTACGAAGTTACAG  5'-GAGGTCCCACTTCAGTGC  5'-GGAATTGGTCGAGAGGAG  5'-GAGAGCCATAAGGTGCTG  5'-GCAGAGATTGGAGGCCTTGTG  5'-GGGTTGTTGCTGAACTTCCAGTC  5'-CAGGAGGGAGAACAGAAACTCCA  5'-CCTGGTTGGCTGCTTGCTT  5'-GGAAGCACGGCAGCAGAATA  5'-AACTTGAGGGAGAAGTAGGAATGG  5'-CCCTTTGCTATGGTGTCCTT  5'-TGGTTTCTCTTCCCAAGACC  5'-AAACACAGACTGACCCTTCCC  5'-GTTAGTGTACCGCACCCTCC  5'-GACCGCAACAACGCCATCTA  5'-GGCGTATCAGTGGGGGTCAG  5'-CATCCGTAAAGACCTCTATGCCAAC  5'-ATGGAGCCACCGATCCACA  5'-GCACCCAUAAGUUCUUAUATT  5'-GGACACACCUAUGAUGUUATT  5'-GAACUCACCUCCUGAUUAUTT  5'-CCCAACACCTATACCTGCGTGTGTA  5'- TGTAAGGATGGTGTGGCCACCTTTA  5'- TGATGGCTACGAATGTGCCTGTGAA  5'-TGTGACACTGGGTTTCTGAGCTTT  5'-ATCCCTAAATTTGTGGCTGGGCCA  5'-AAGGAGGATGTAGTGTTG  5'-TGCGGTACTTGAGTACAT  5'-ACAGATGCCTGCAATTCA  5'-ACAGTCTTGCGTTTGTAG  5'-GTTCAGCTATTGGGTAAG  5'-CTGACTCTAGCTCAACTC  5'-CCAGTACTTCCAATATTTC  5'-ATGCAGCAAACATCTGTG  5'-GCAGCAGCATCTTTGAAGGCAAGCC  5'-CCGTCGTCTAGCAGCCTTCTCCTGAAG |

*F, forward; R, reverse.

**Primer 1 is the gene-specific primer (GSP) and Primer 2 is the nested gene-specific primer (NGSP) used for RACE.

**Table S2.** Antibodies and related reagents used in this study.

| **Name** | **Supplier** | **Clone #** |
| --- | --- | --- |
| APC CD11b  Alexa 488 F4/80  biotin F4/80  biotin MHC II  PE MR  APC Ly6C  biotin CD31  biotin Ly6G  PE VCAM-1  FITC CD3  APC CD3ε  PE CD4  APC CD8  RBP-J  NIC  APC streptavidin  PE avidin  Cy3 avidin  HRP goat anti-rabbit IgG  HRP goat anti-mouse IgG | Biolegend  Biolegend  eBioscience  BD Pharmingen  Biolegend  Biolegend  Biolegend  Biolegend  eBioscience  BD Pharmingen  Biolegend  BD Pharmingen  BD Pharmingen  Santa Cruz Biotechnology  Sigma  Biolegend  eBioscience  eBioscience  Boster Bio Tec  Boster Bio Tec | M1/70  BM8  BM8  KH74  15-2  HK1.4  MEC13.3  1A8  429  17A2  145-2C11  RM4-5  53-6.7  H-50  mN1A |
